# Supplementary material for: Specific Antibodies and Arachidonic Acid Mediate the Protection Induced by the Schistosoma mansoni Cysteine Peptidase-Based Vaccine in Mice
Source: PubMed Central journal article supplement (PMC7712720; doi:10.3390/vaccines8040682), 2020-11-16
Supplement: vaccines-08-00682-s001.pdf [file vaccines-08-00682-s001.pdf]

**Table S1.** Effect of immunization with SmCB1 or SmCL3 on worm burden of challenge *S. mansoni* infection in outbred mice.

| PARAMETER                     | Infected controls | VACCINE         |                 |
|-------------------------------|-------------------|-----------------|-----------------|
|                               |                   | SmCB1-immunized | SmCL3-immunized |
| <b>Individual worm burden</b> |                   | 28              | 30              |
|                               |                   | 22              | 32              |
|                               | 54                | 23              | 28              |
|                               | 52                | 20              | 27              |
|                               | 53                | 25              | 25              |
|                               | 58                | 27              | 31              |
|                               | 58                | 26              | 25              |
|                               | 62                | 24              | 29              |
|                               | 67                |                 |                 |
|                               | 60                |                 |                 |
|                               | <b>Mean</b>       | <b>58.0</b>     | 24.3            |
| <b>SD</b>                     | <b>5.1</b>        | 2.7             | 2.6             |
| <b>Percent reduction</b>      |                   | 58.1            | 51.2            |
| <b><i>p</i> value</b>         |                   | 0.0002          | 0.0002          |

Vaccinated mice were challenged 3 weeks after second immunization with 150 cercariae of *S. mansoni* in parallel with unimmunized mice (infected controls), and assessed (eight per group) for worm burden 40 days post infection. ANOVA, Students' *t*-2-tailed and Mann-Whitney tests were used to analyze the statistical significance of differences between selected values and considered significant at  $P < 0.05$ . Significances of differences between immunized and unimmunized control mice are shown.

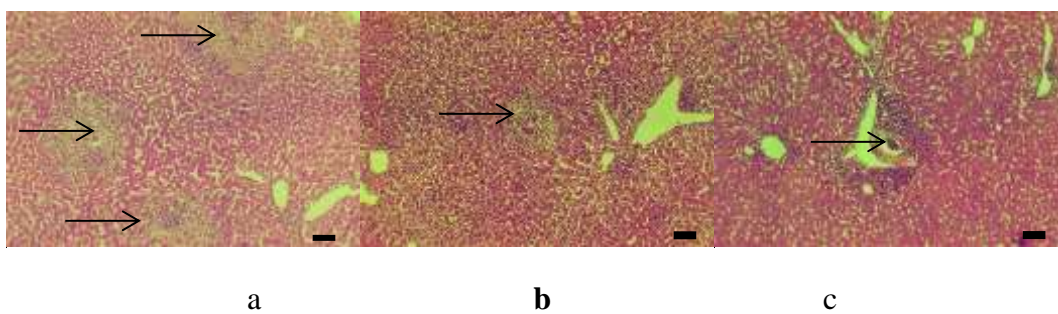

**Figure S1.** Haematoxylin and eosin-stained liver sections of unimmunized infected (infected), and SmCB1 and SmCL3-immunized mice 40 days post infection. Arrows point to circumoval granulomas. Scale bars = 30  $\mu$ m. a: Infected, b: SmCB1, c: SmCL3

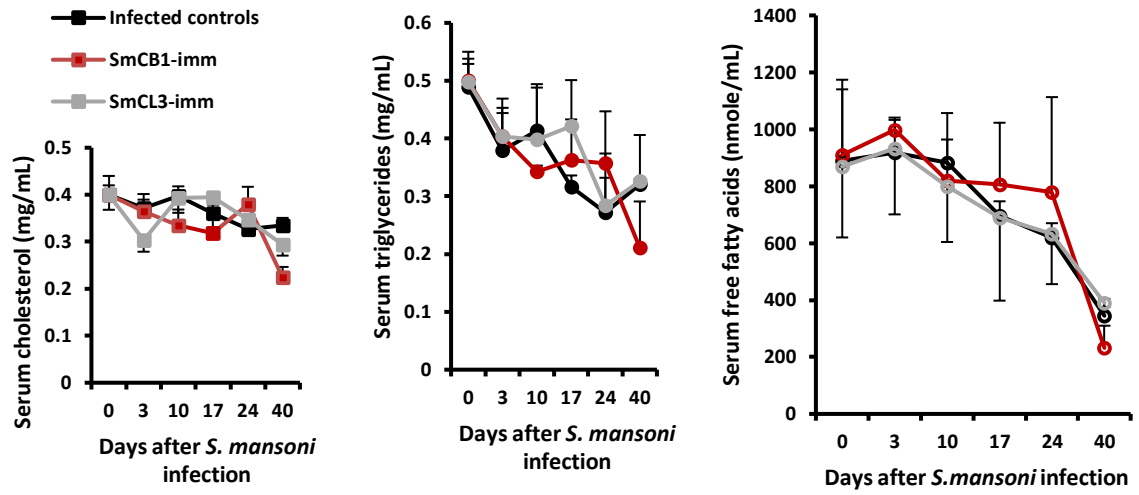

**Figure S2.** Each point in the figures represents mean of serum lipid values of 6 individual mice. Naïve control mice had  $0.4 \pm 0.1$  mg/mL serum cholesterol,  $0.48 \pm 0.2$  mg/mL serum triglycerides, and  $800 \pm 120$  nmol free fatty acids/mL.
